# Supplementary material
Source: HighWire-hosted journal article supplement (doi:10.1101/rna.076539.120)
Supplement: Supplemental_Figures_and_Tables.pdf [file Supplemental_Figures_and_Tables.pdf]

# Supplemental Figures and Tables

for

**The origin of the high stability of 3'-terminal uridine tetrads. The contributions of hydrogen bonding, stacking interactions and steric factors evaluated using modified oligonucleotide analogs.**

Witold Andrałojć,<sup>1</sup> Karol Pasternak,<sup>1</sup> Joanna Sarzyńska,<sup>1</sup> Karolina Zielińska,<sup>1</sup> Ryszard Kierzek,<sup>1</sup>

Zofia Gdaniec<sup>1,\*</sup>

<sup>1</sup>Institute of Bioorganic Chemistry, Polish Academy of Sciences, 61-704 Poznan, Noskowskiego 12/14,  
Poland

Supplemental Fig. S1. The chemical modifications of the 3'-terminal uridine residue (G-quadruplexes M0-M7). The left panel presents the scheme of a hypothetical tetrad formed by each modified 3'-terminal residue with predicted hydrogen bonds marked in blue and the modified sites in red. The central and right panels show this hypothetical tetrad in the context of the 3'-terminal part of the r(UGGUGGU)<sub>4</sub> G-quadruplex, assuming that the 'reversed' U-tetrad conformation is preserved.

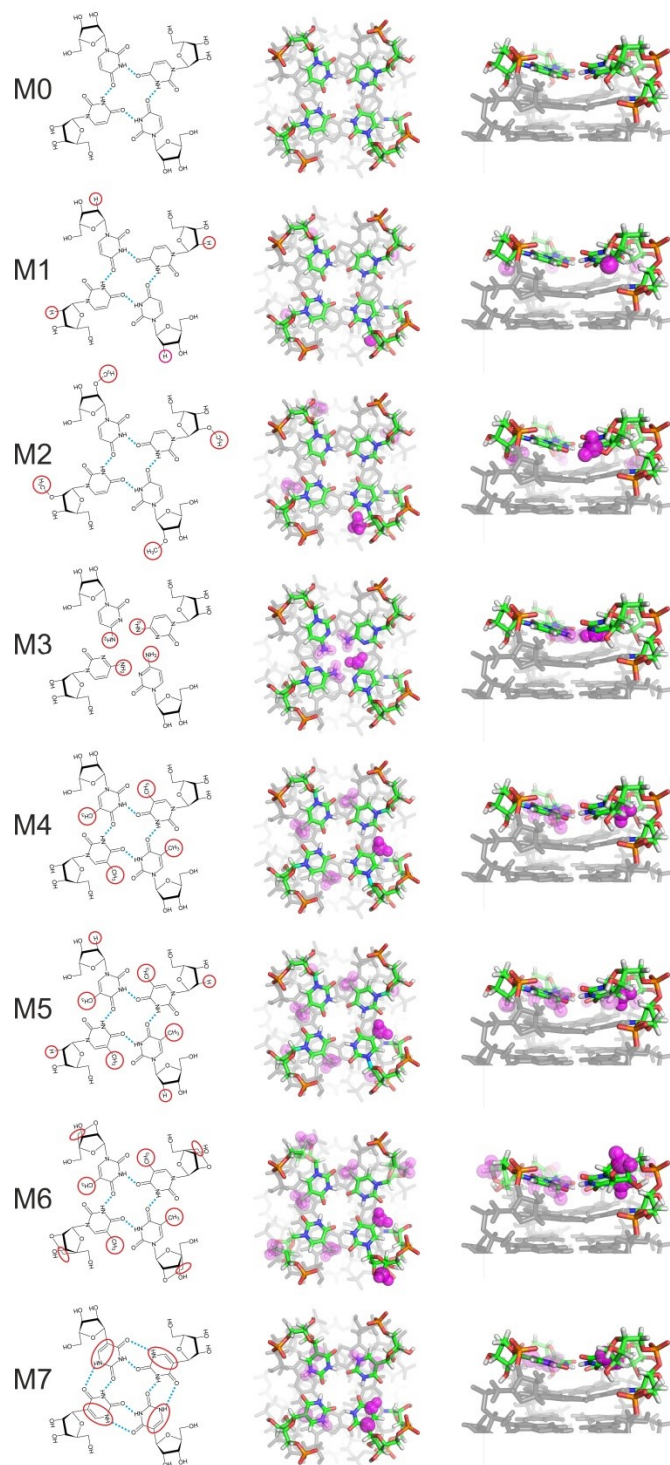

Supplemental Fig. S2. The UV melting curves recorded for the G-quadruplexes M0-M8 in the Na<sup>+</sup> containing buffer.

### 3'-terminal modifications

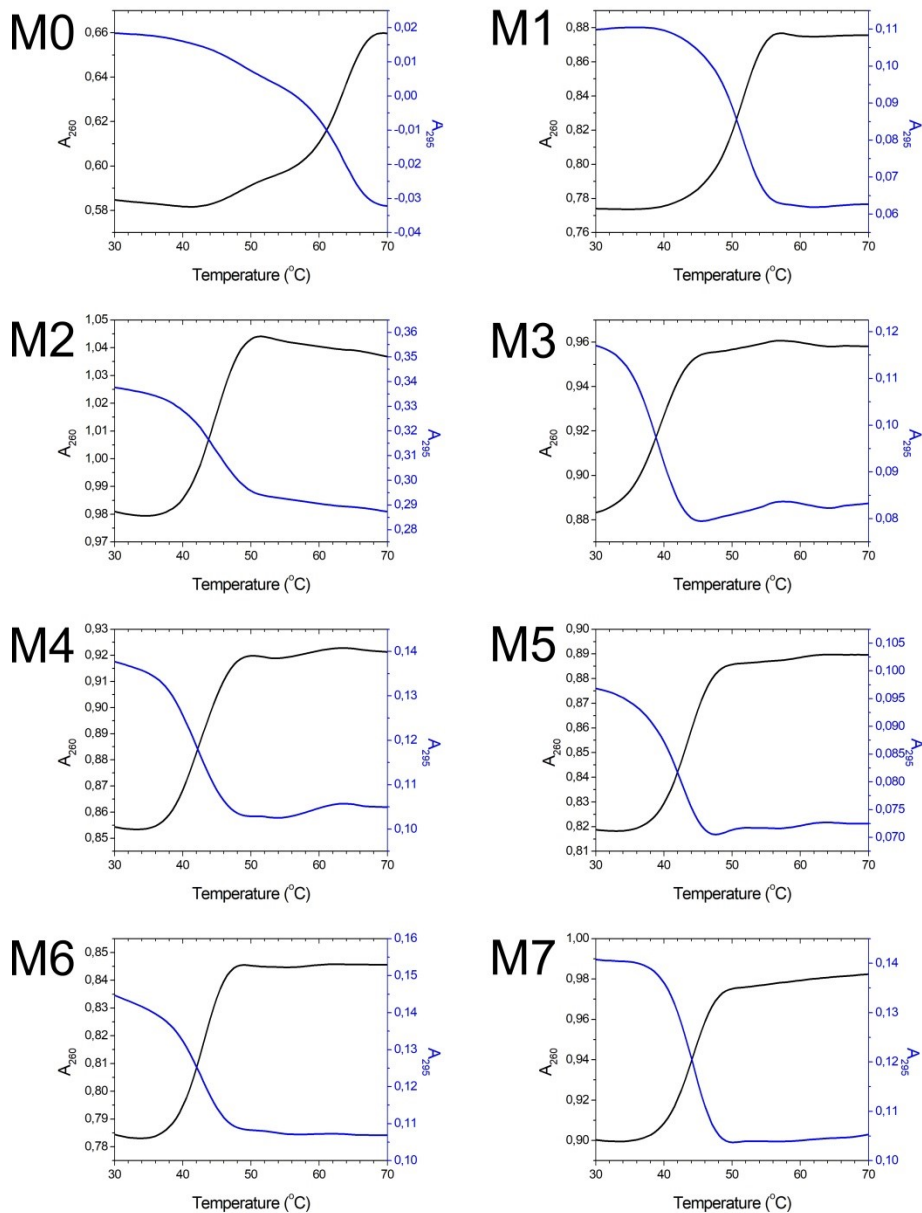

### internal modifications

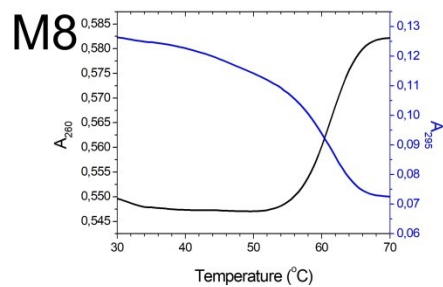

Supplemental Fig. S3. The UV melting curves recorded for the G-quadruplexes M0-M8 in the  $K^+$  containing buffer.

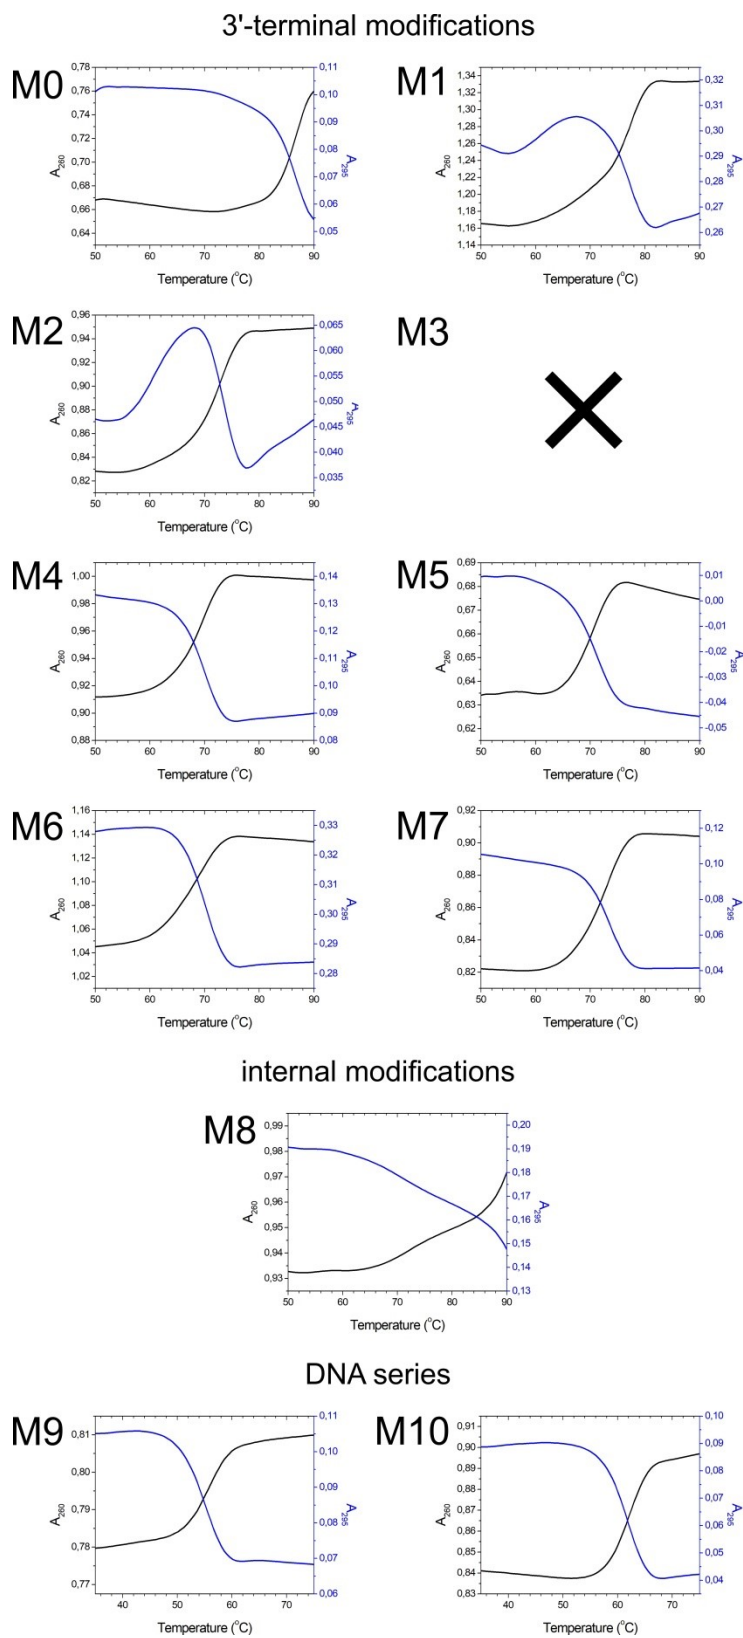

Supplemental Fig. S4. The aromatic-to-sugar regions of the NOESY spectra of the M0-M7 G-quadruplexes in Na<sup>+</sup> containing conditions at 25 °C.

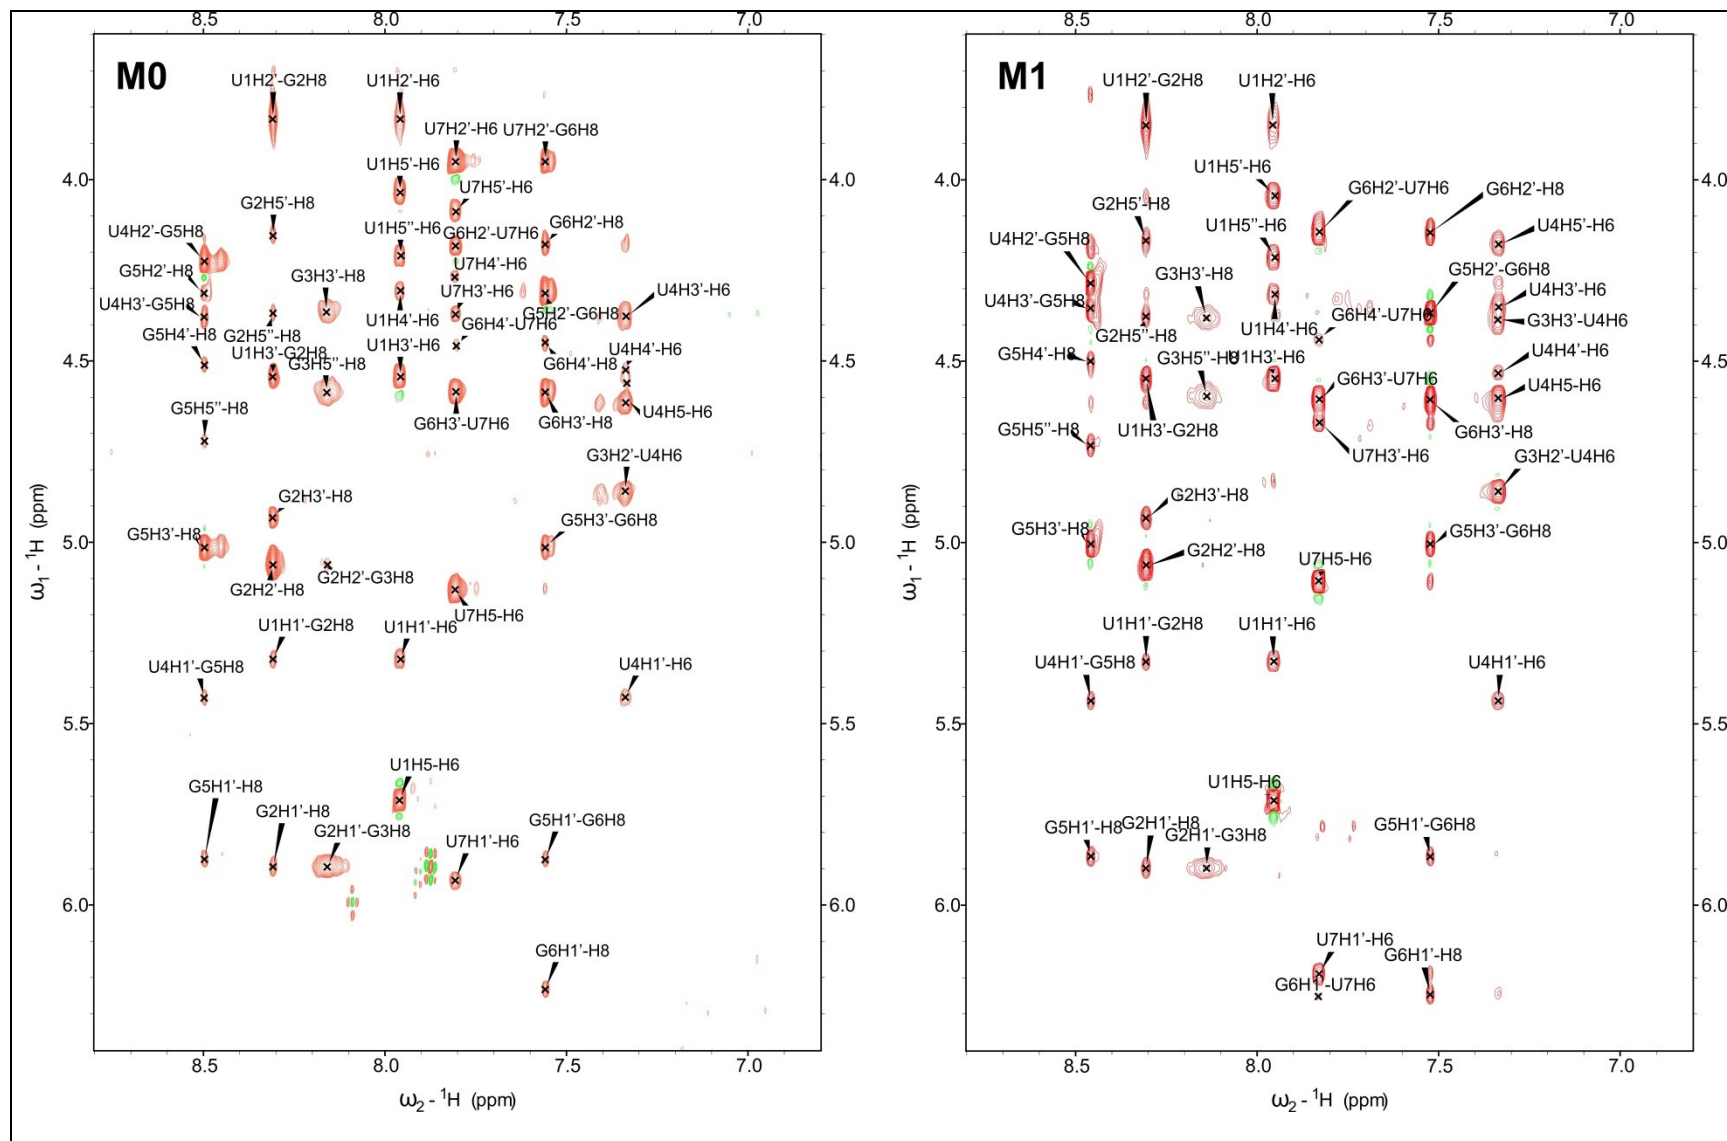

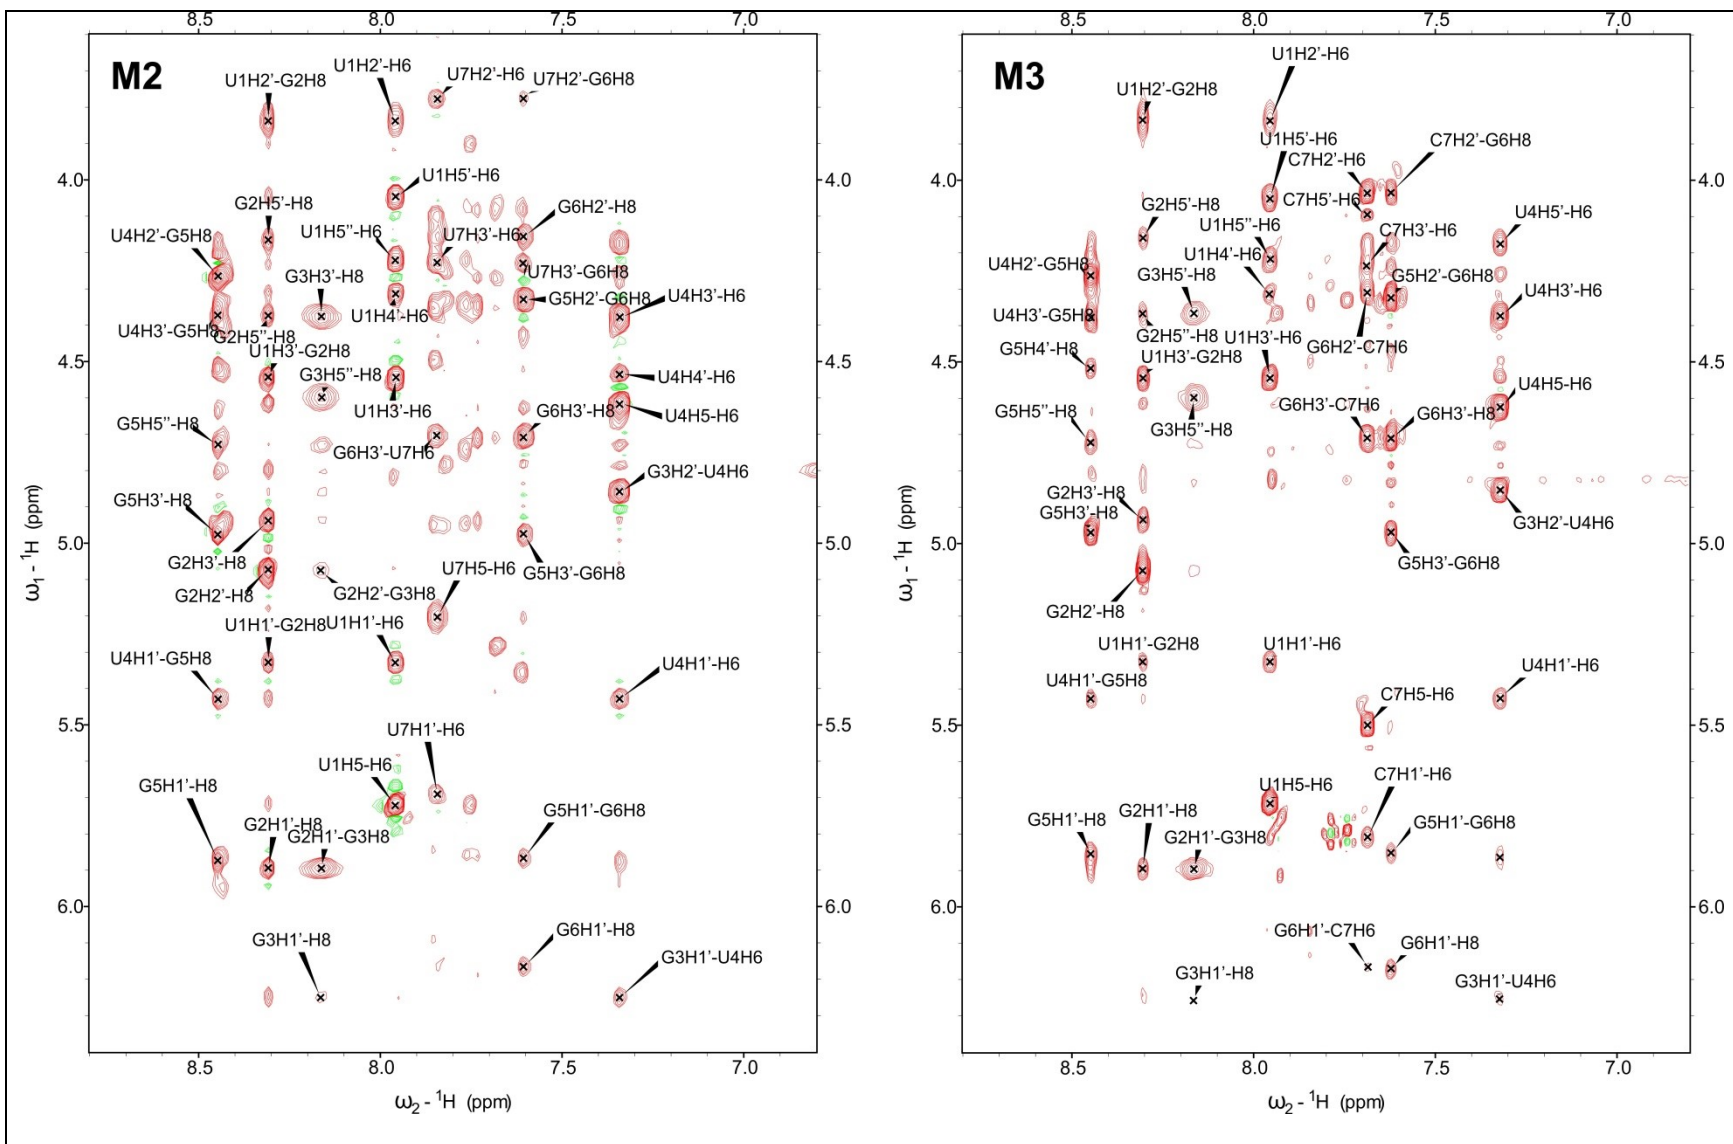

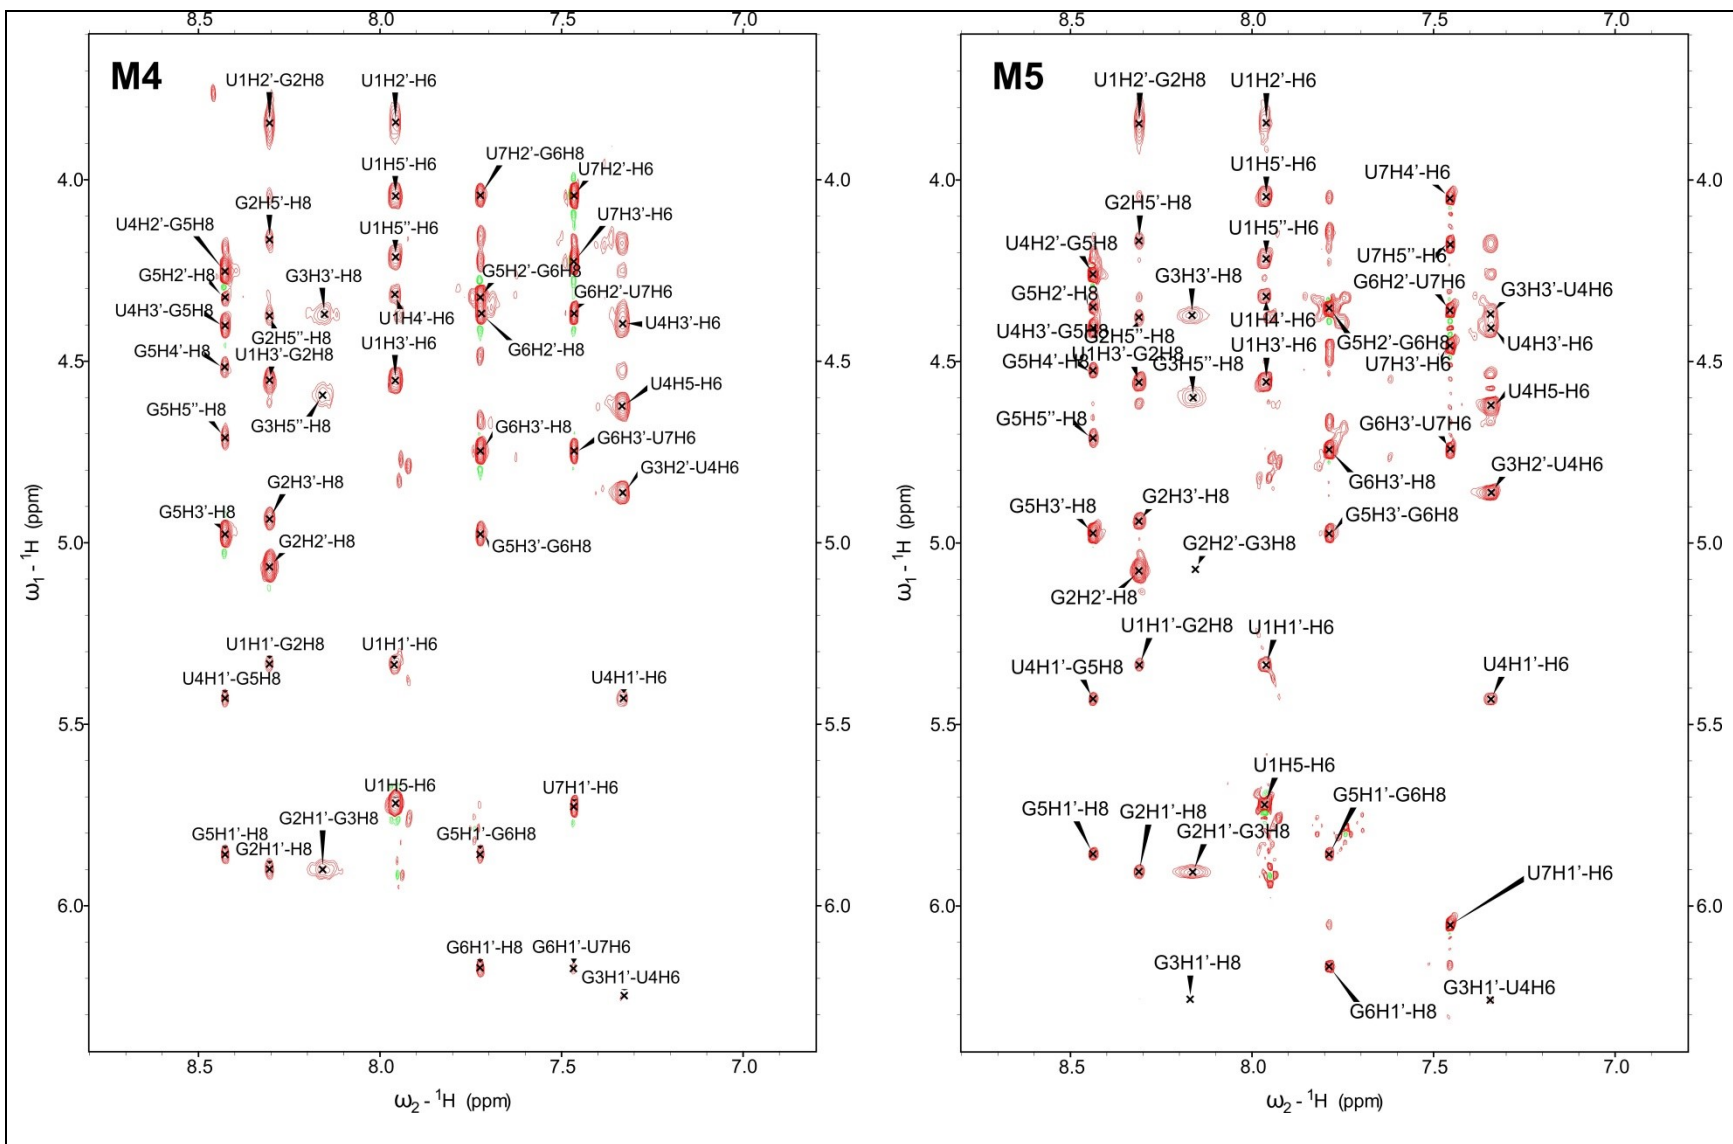

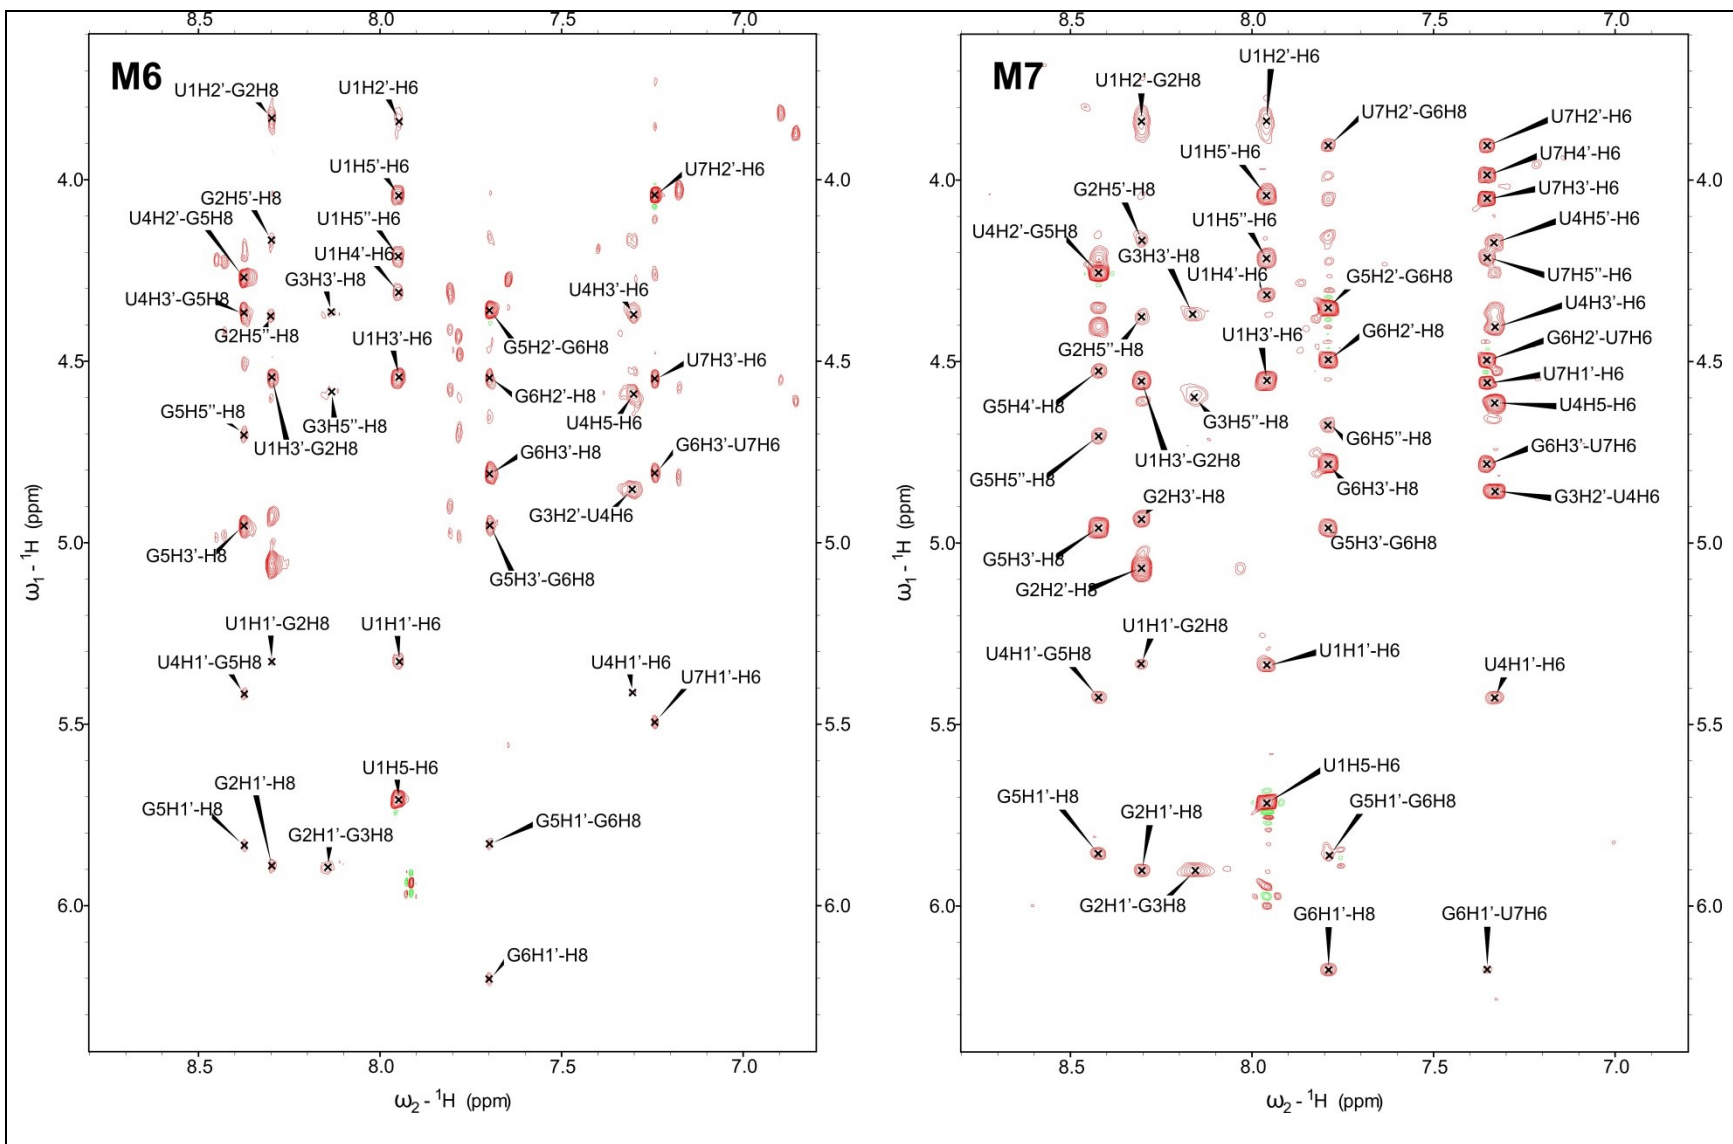

Supplemental Fig. S5. The  $^1\text{H}$ -NMR spectra (anomeric region) of G-quadruplexes M0-M7 recorded in  $\text{Na}^+$  containing conditions at 25 °C. The blue dotted lines follow the H1' resonance of the modified 3'-terminal residue. Additional NMR signals from minor species present in some of the samples are marked with asterisks.

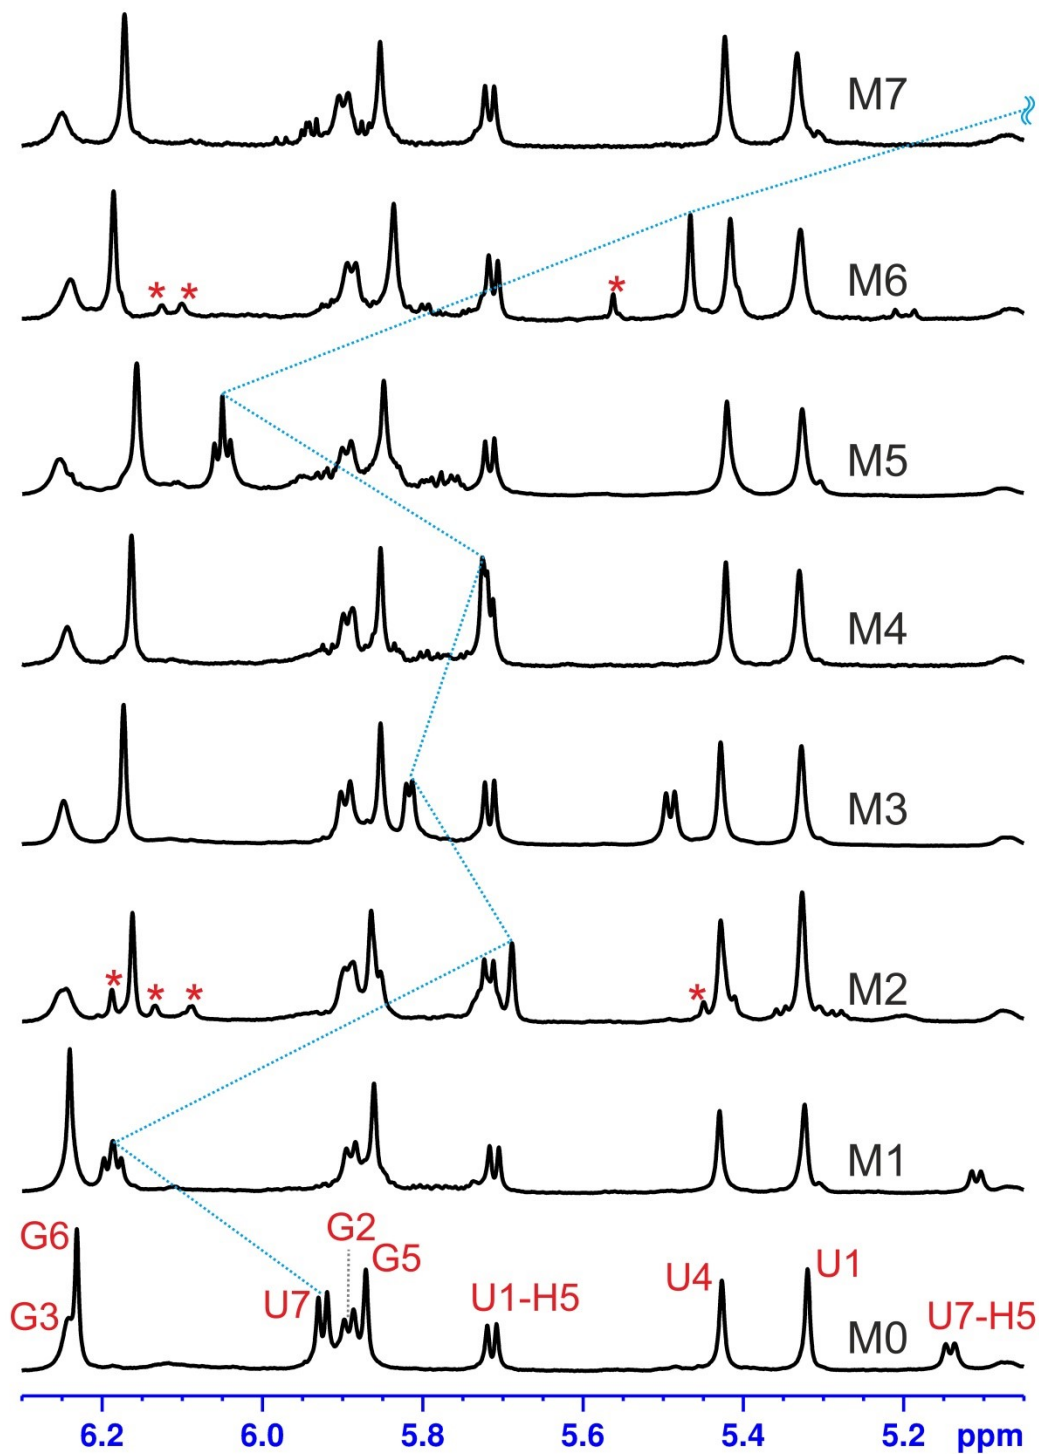

Supplemental Fig. S6. The  $^1\text{H}$ - $^{31}\text{P}$ -SOFAST-HMQC spectrum recorded for M0 at 15°C in  $\text{K}^+$  containing conditions. The full proton and phosphorus spectra recorded in the same conditions are presented as projections

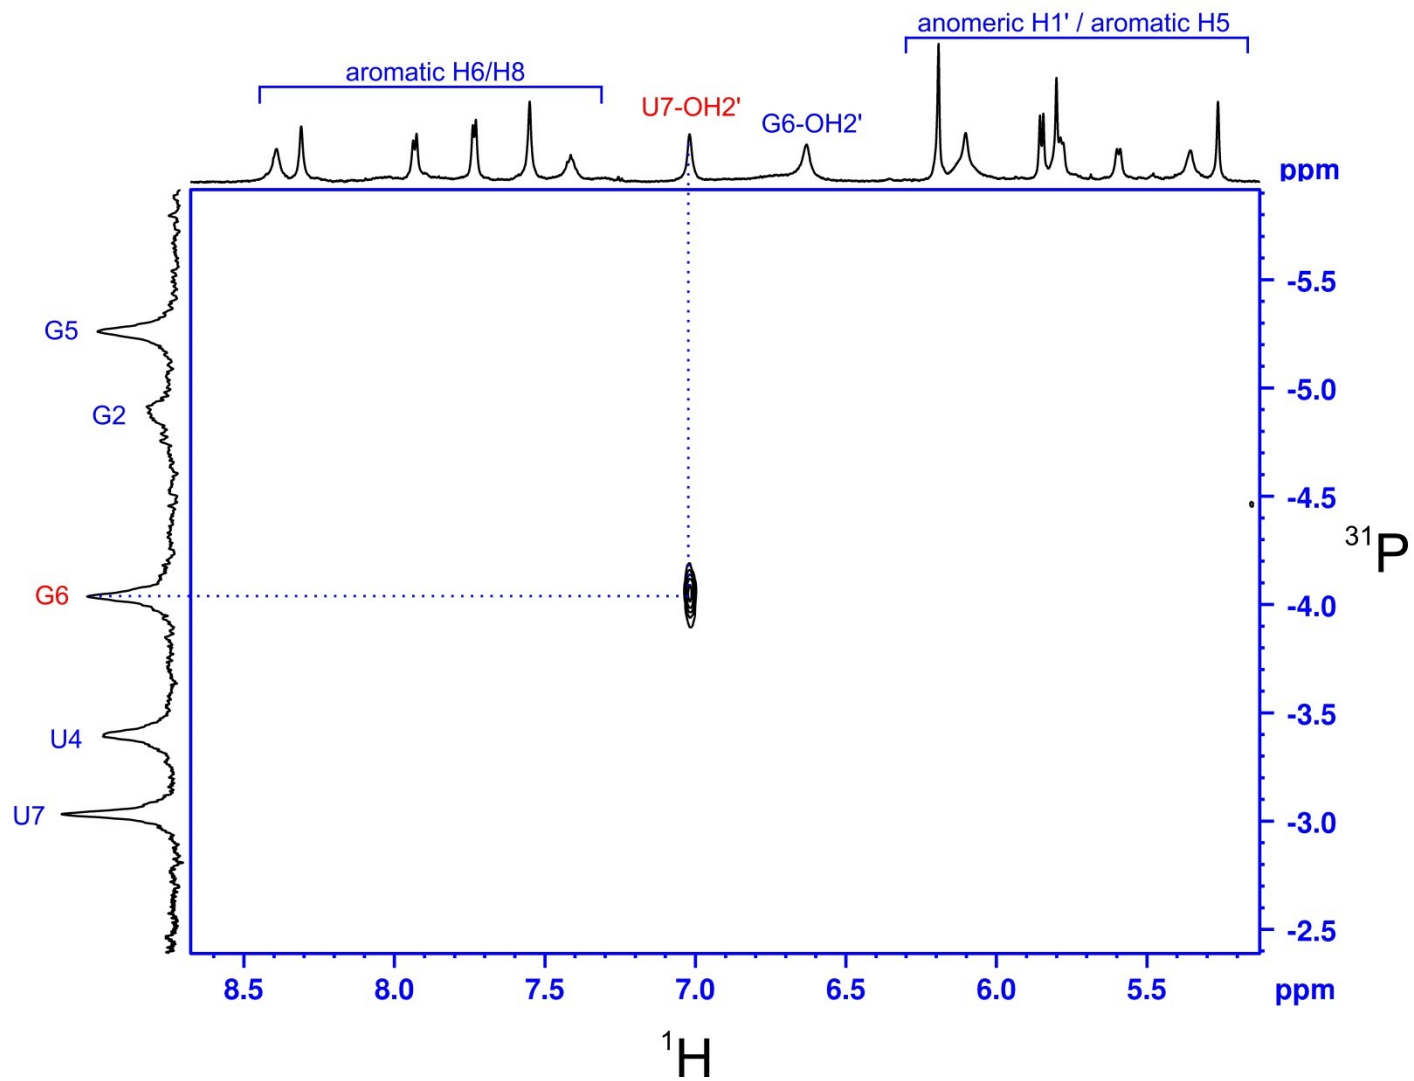

Supplemental Fig. S7. The  $^1\text{H}$ -NMR spectra (imino and aromatic regions) of G-quadruplexes M8 (top) and M0 (bottom; for comparison) recorded in  $\text{K}^+$  containing conditions at 25  $^\circ\text{C}$ .

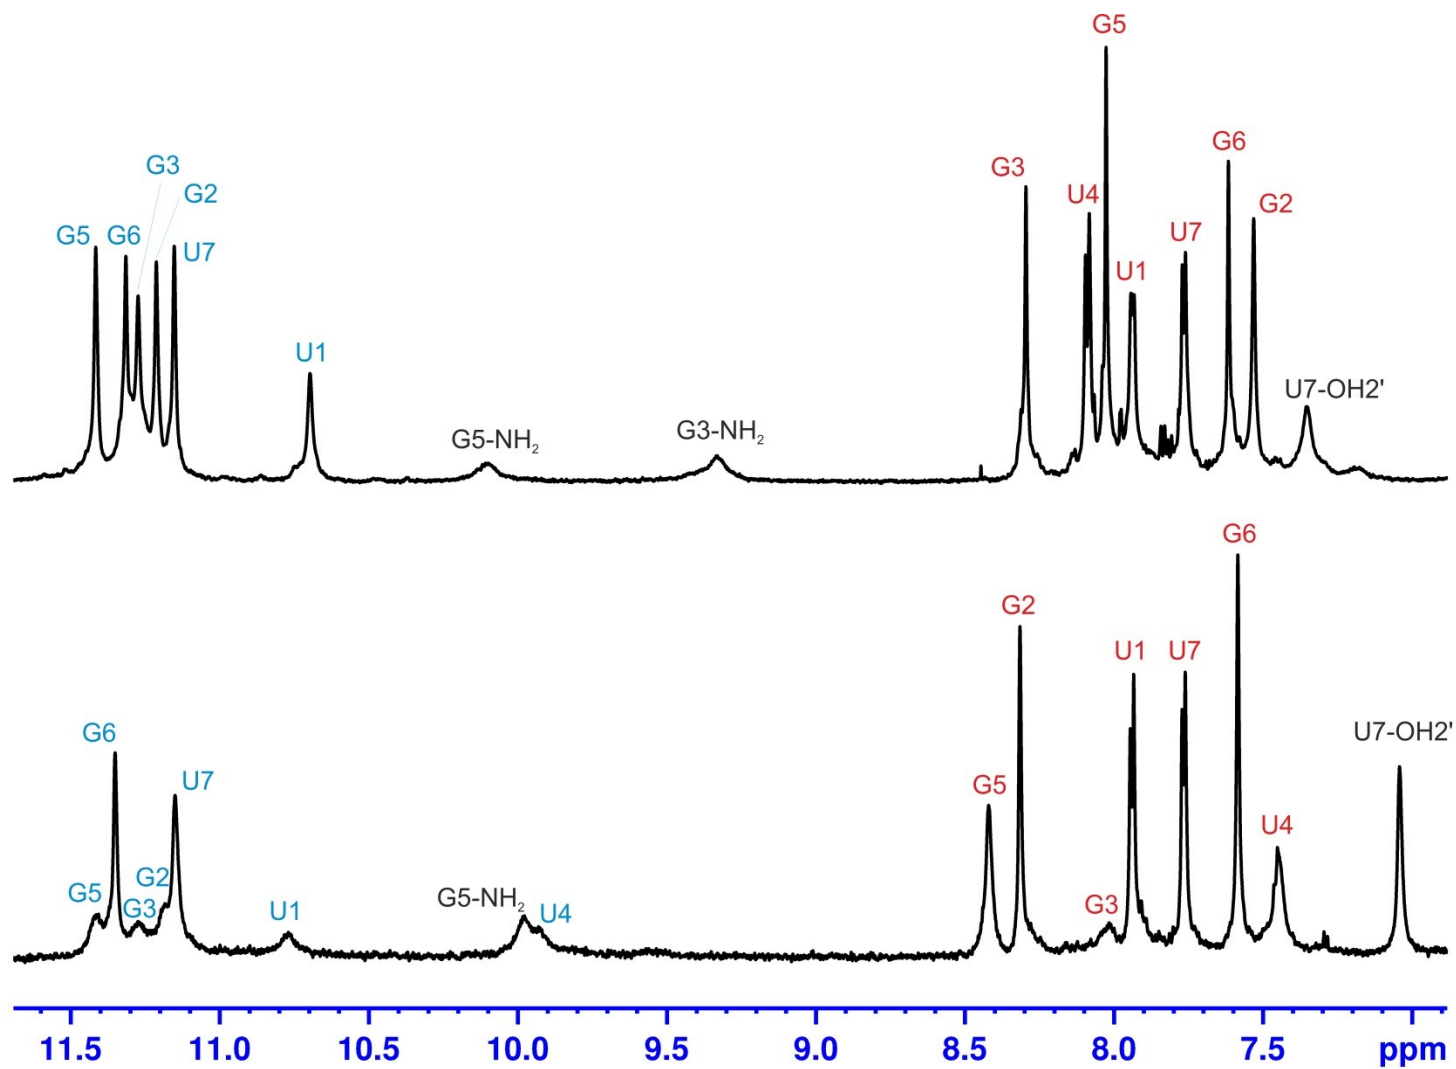

Supplemental Fig. S8. The imino-imino and imino-aromatic regions of the NOESY spectrum recorded for M8 in  $K^+$  containing conditions at 25 °C. The NOE cross-peaks indicating spatial proximity between residues G3 and G5 (and thus bulging-out of U4) are underlined in green.

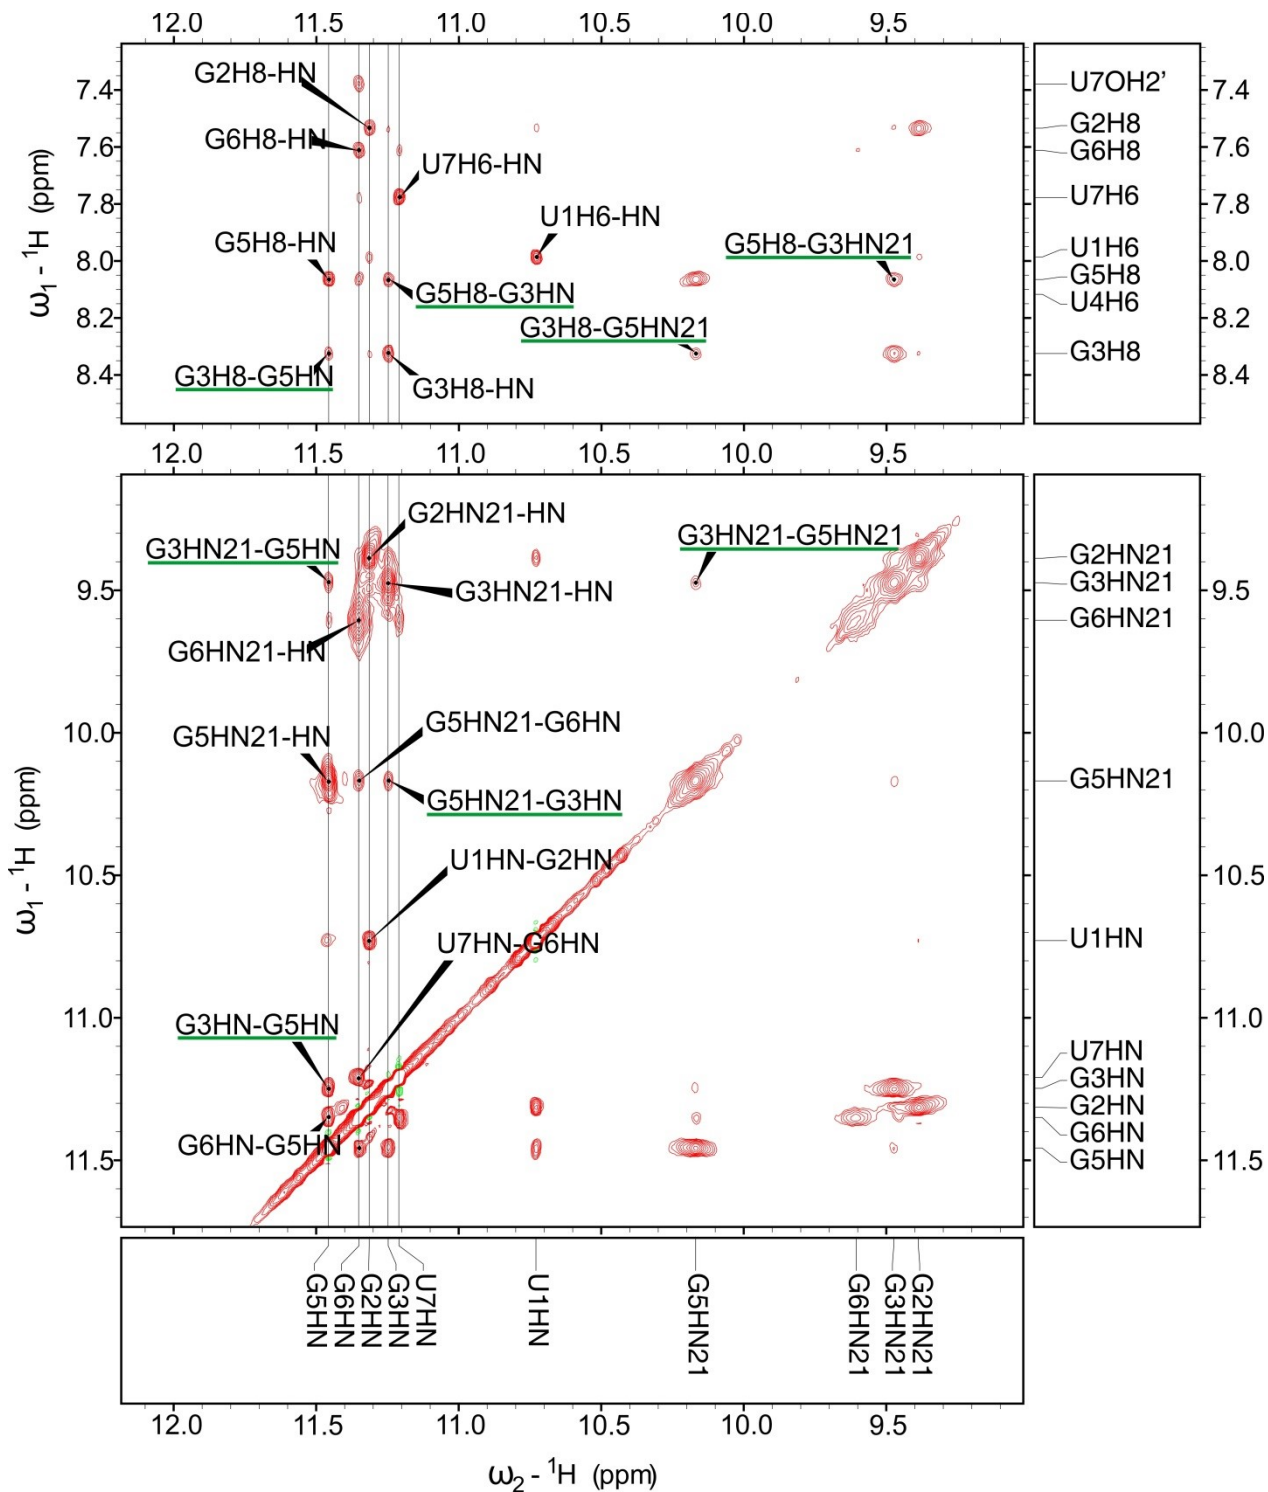

Supplemental Fig. S9. The  $^1\text{H}$ -NMR spectra (imino and aromatic regions) of G-quadruplexes M9 and M10. In the panels presenting the spectra recorded in  $\text{K}^+$  containing conditions the asterisks mark the resonances due to residual amounts of single-stranded species.

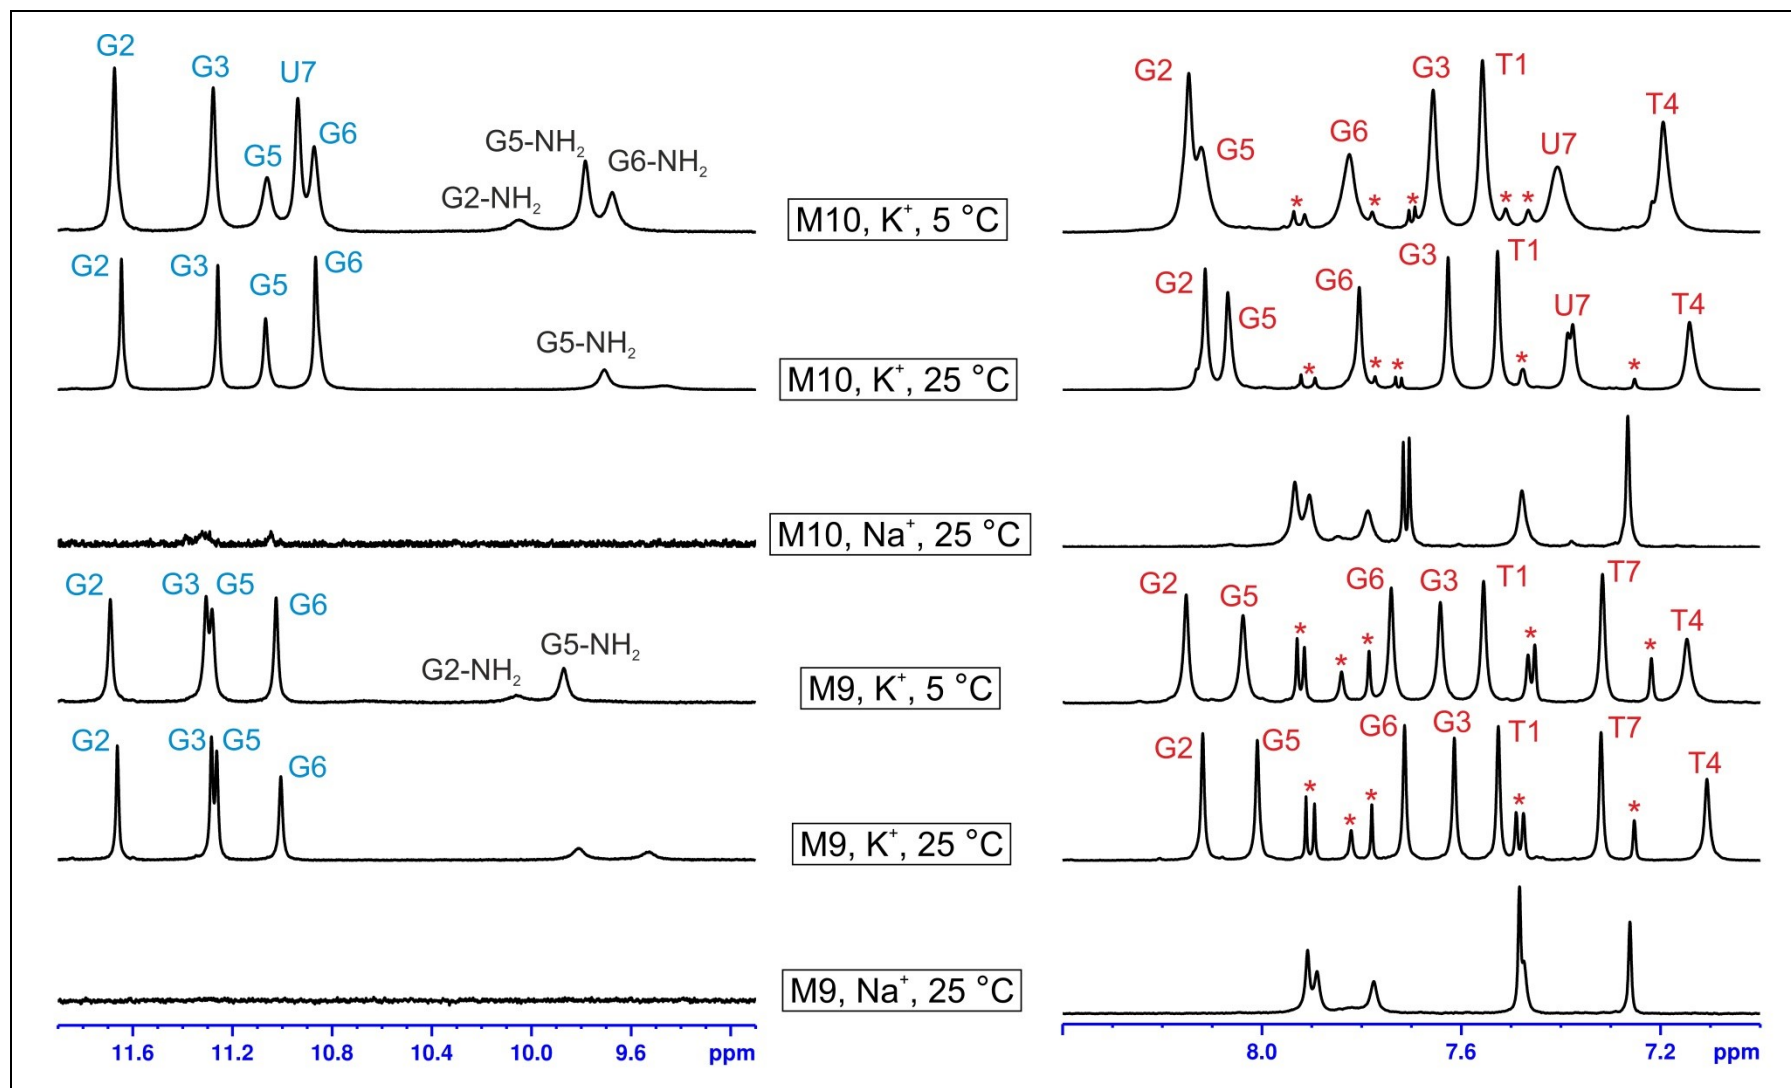

Supplemental Fig. S10. (A) The CD spectra recorded for G-quadruplexes M0-M10 in  $K^+$  containing conditions at 25 °C; (B) the difference between the CD spectrum of each 3'-modified G-quadruplex (M1-M7) and that of the reference one (M0).

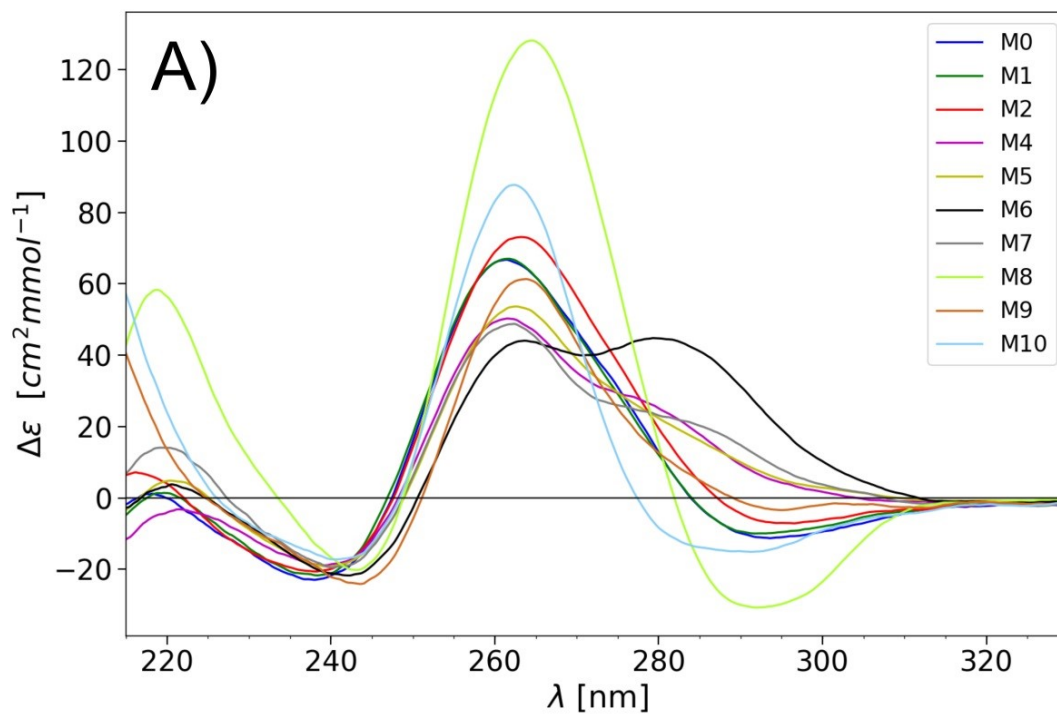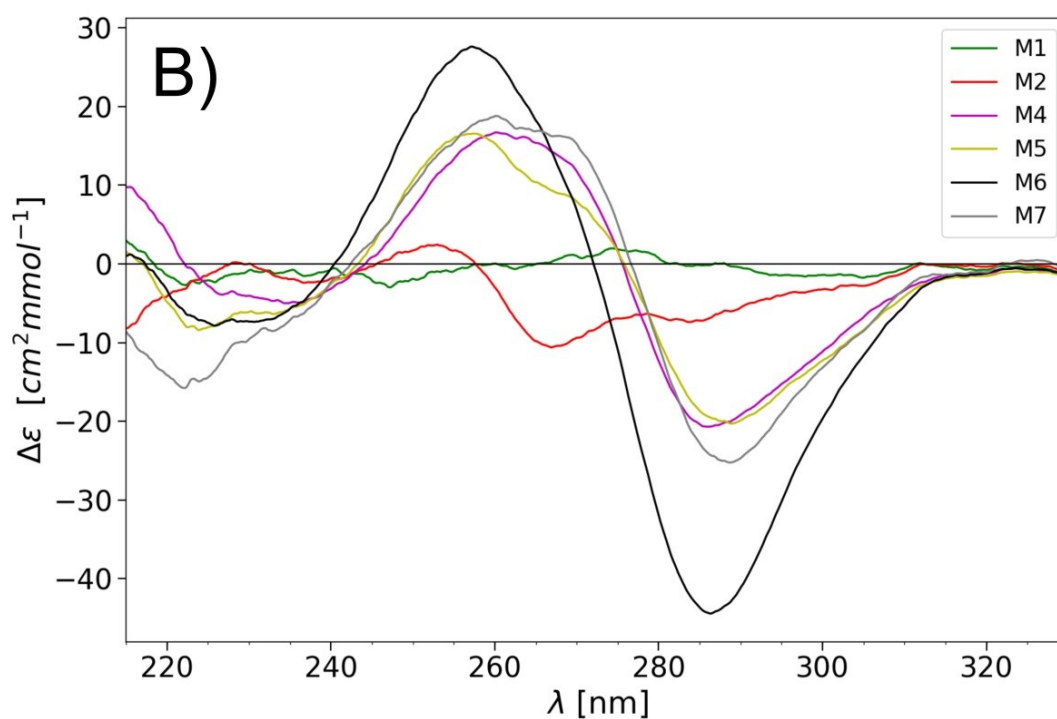

Supplemental Fig. S11. A direct comparison between the CD spectra recorded for G-quadruplexes M0-M10 in Na<sup>+</sup> and K<sup>+</sup> containing conditions.

### 3'-terminal modifications

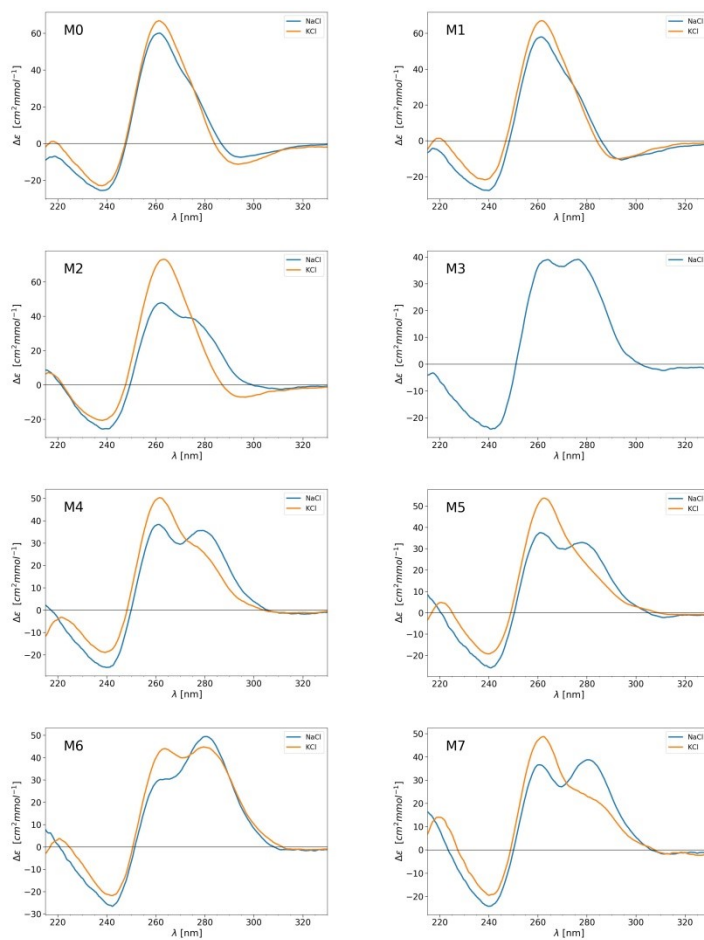

### internal modifications

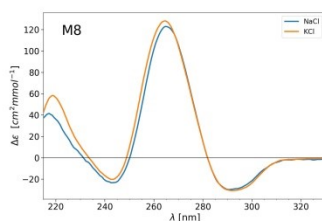

### DNA series

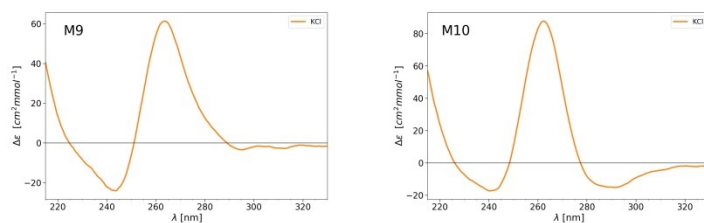

Supplemental Fig. S12. The  $^1\text{H}$ -NMR spectra (imino and aromatic regions) of G-quadruplex M4 recorded at 25 in  $\text{Na}^+$  containing conditions at A) CD sample concentration, B) NMR sample concentration.

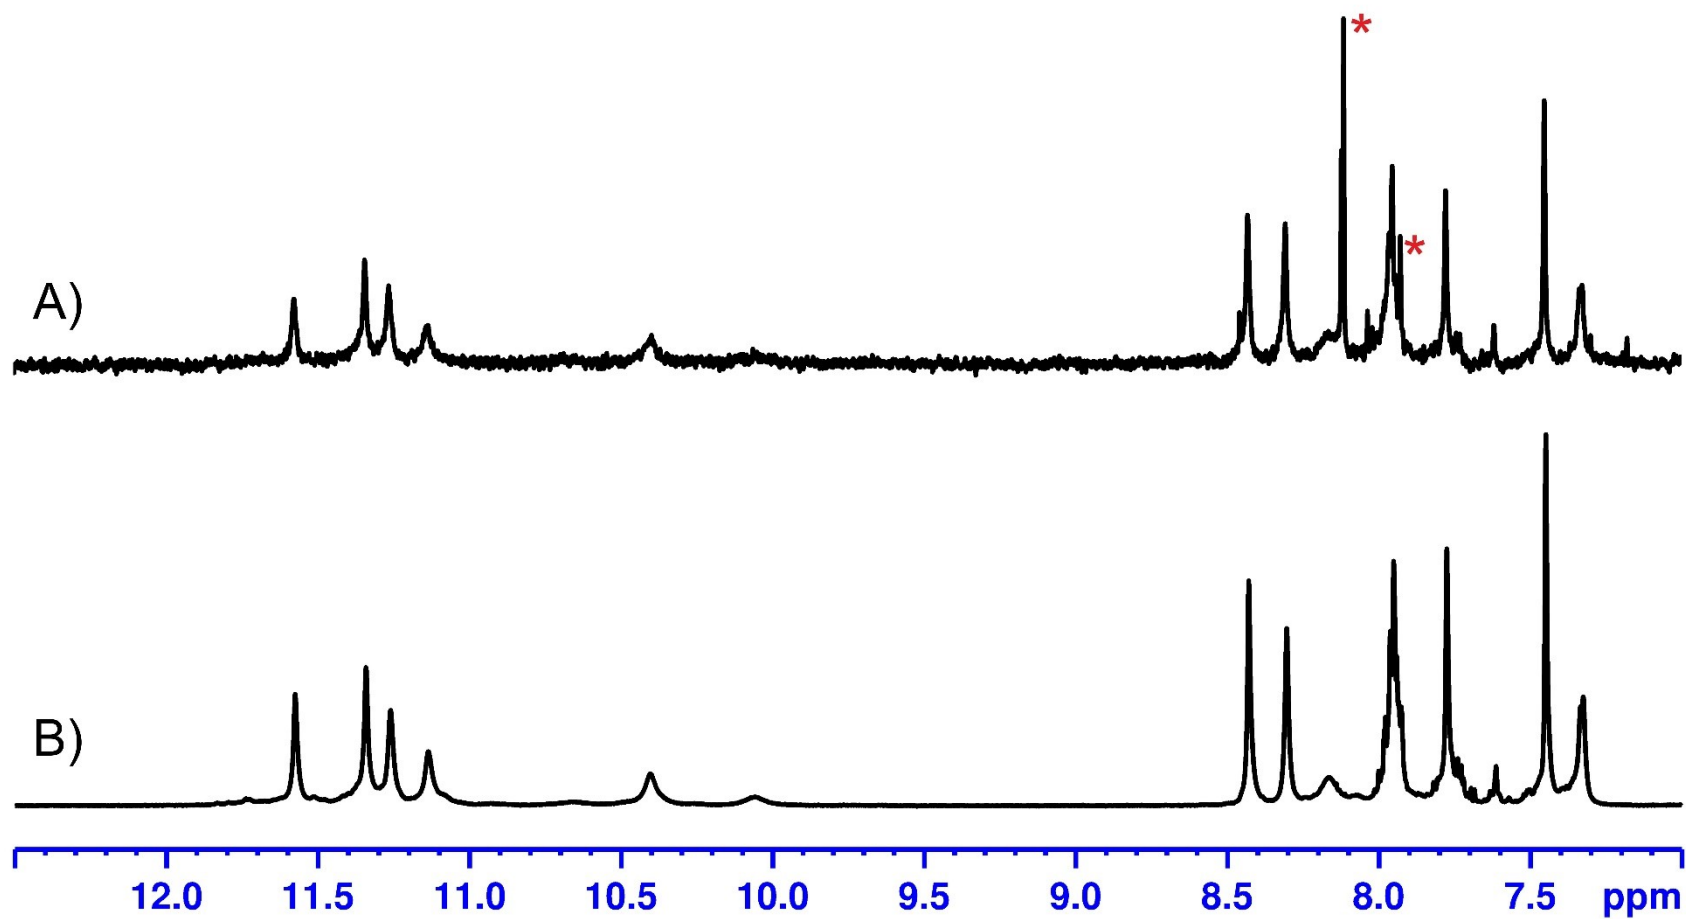

Supplemental Table S1 The proton chemical shift (CS) values measured for the G-quadruplexes M0-M7. All resonances for which the chemical shift difference ( $\Delta$ CS) with respect to M0 is higher than 0.1 ppm are marked in orange.

| Residue | Atom | M0    | M1    | M2    | M3    | M4    | M5    | M6    | M7    |
|---------|------|-------|-------|-------|-------|-------|-------|-------|-------|
| U1      | H1'  | 5.323 | 5.329 | 5.329 | 5.325 | 5.335 | 5.336 | 5.328 | 5.333 |
| U1      | H2'  | 3.831 | 3.849 | 3.837 | 3.836 | 3.843 | 3.844 | 3.839 | 3.839 |
| U1      | H3'  | 4.546 | 4.547 | 4.545 | 4.547 | 4.553 | 4.558 | 4.545 | 4.553 |
| U1      | H4'  | 4.311 | 4.317 | 4.313 | 4.314 | 4.315 | 4.321 | 4.311 | 4.316 |
| U1      | H5'  | 4.043 | 4.044 | 4.046 | 4.045 | 4.045 | 4.045 | 4.044 | 4.042 |
| U1      | H5'' | 4.216 | 4.213 | 4.218 | 4.214 | 4.216 | 4.216 | 4.212 | 4.217 |
| U1      | H5   | 5.713 | 5.711 | 5.722 | 5.716 | 5.717 | 5.722 | 5.708 | 5.721 |
| U1      | H6   | 7.958 | 7.954 | 7.958 | 7.955 | 7.958 | 7.961 | 7.948 | 7.960 |
| G2      | H1'  | 5.893 | 5.896 | 5.895 | 5.896 | 5.898 | 5.904 | 5.890 | 5.901 |
| G2      | H2'  | 5.068 | 5.060 | 5.073 | 5.074 | 5.066 | 5.075 | 5.060 | 5.070 |
| G2      | H3'  | 4.934 | 4.933 | 4.935 | 4.934 | 4.934 | 4.941 | 4.926 | 4.934 |
| G2      | H4'  | 4.605 | 4.609 | 4.608 | 4.609 | 4.610 | 4.614 | 4.603 | 4.608 |
| G2      | H5'  | 4.159 | 4.168 | 4.165 | 4.159 | 4.165 | 4.167 | 4.164 | 4.166 |
| G2      | H5'' | 4.370 | 4.375 | 4.373 | 4.367 | 4.374 | 4.378 | 4.371 | 4.377 |
| G2      | H8   | 8.306 | 8.305 | 8.308 | 8.304 | 8.304 | 8.311 | 8.298 | 8.304 |
| G3      | H1'  | 6.244 | 6.239 | 6.251 | 6.252 | 6.247 | 6.259 | 6.238 | 6.252 |
| G3      | H2'  | 4.859 | 4.859 | 4.858 | 4.856 | 4.862 | 4.861 | 4.852 | 4.858 |
| G3      | H3'  | 4.368 | 4.393 | 4.376 | 4.366 | 4.368 | 4.373 | 4.364 | 4.367 |
| G3      | H4'  | 4.724 | 4.722 | 4.730 | 4.727 | 4.728 | 4.732 | 4.722 | 4.724 |
| G3      | H5'  | 4.375 | 4.364 | ---   | 4.368 | 4.372 | ---   | ---   | ---   |
| G3      | H5'' | 4.594 | 4.580 | 4.599 | 4.599 | 4.592 | 4.601 | 4.585 | 4.595 |
| G3      | H8   | 8.161 | 8.139 | 8.163 | 8.164 | 8.156 | 8.163 | 8.137 | 8.159 |
| U4      | H1'  | 5.430 | 5.436 | 5.428 | 5.427 | 5.428 | 5.430 | 5.418 | 5.426 |
| U4      | H2'  | 4.230 | 4.285 | 4.265 | 4.262 | 4.254 | 4.260 | 4.272 | 4.256 |
| U4      | H3'  | 4.380 | 4.347 | 4.377 | 4.382 | 4.399 | 4.410 | 4.371 | 4.404 |
| U4      | H4'  | 4.523 | 4.537 | 4.533 | 4.528 | 4.527 | 4.534 | 4.525 | 4.525 |
| U4      | H5'  | ---   | 4.174 | ---   | 4.176 | ---   | ---   | ---   | 4.172 |
| U4      | H5'' | 4.647 | 4.634 | ---   | 4.640 | ---   | ---   | ---   | ---   |
| U4      | H5   | 4.619 | 4.603 | 4.617 | 4.624 | 4.623 | 4.619 | ---   | 4.613 |
| U4      | H6   | 7.333 | 7.336 | 7.342 | 7.320 | 7.330 | 7.342 | 7.304 | 7.331 |
| G5      | H1'  | 5.875 | 5.865 | 5.868 | 5.853 | 5.858 | 5.856 | 5.835 | 5.856 |
| G5      | H2'  | 4.318 | 4.366 | 4.329 | 4.334 | 4.324 | 4.350 | 4.359 | 4.353 |
| G5      | H3'  | 5.015 | 5.004 | 4.977 | 4.976 | 4.976 | 4.974 | 4.954 | 4.958 |
| G5      | H4'  | 4.514 | 4.498 | 4.516 | 4.514 | 4.514 | 4.523 | 4.504 | 4.524 |
| G5      | H5'  | 4.181 | 4.188 | 4.200 | 4.191 | 4.199 | 4.210 | 4.199 | 4.210 |
| G5      | H5'' | 4.725 | 4.730 | 4.728 | 4.722 | 4.709 | 4.710 | 4.702 | 4.705 |
| G5      | H8   | 8.494 | 8.458 | 8.446 | 8.448 | 8.427 | 8.438 | 8.374 | 8.422 |

|    |                  |                  |                  |       |                  |       |       |       |       |
|----|------------------|------------------|------------------|-------|------------------|-------|-------|-------|-------|
| G6 | H1'              | 6.234            | 6.246            | 6.163 | 6.173            | 6.172 | 6.167 | 6.199 | 6.176 |
| G6 | H2'              | 4.188            | 4.149            | 4.157 | 4.308            | 4.369 | 4.359 | 4.547 | 4.496 |
| G6 | H3'              | 4.587            | 4.604            | 4.702 | 4.710            | 4.747 | 4.742 | 4.810 | 4.782 |
| G6 | H4'              | 4.453            | 4.438            | 4.436 | 4.471            | 4.481 | 4.491 | 4.453 | 4.485 |
| G6 | H5'              | 4.172            | 4.139            | 4.157 | 4.161            | 4.151 | 4.139 | 4.161 | 4.161 |
| G6 | H5''             | 4.645            | 4.613            | 4.632 | 4.675            | 4.664 | 4.669 | 4.648 | 4.674 |
| G6 | H8               | 7.556            | 7.524            | 7.606 | 7.621            | 7.724 | 7.788 | 7.699 | 7.790 |
| U7 | H1'              | 5.931            | 6.188            | 5.692 | 5.808            | 5.728 | 6.051 | 5.493 | 4.559 |
| U7 | H2'              | 3.955            | 1.908            | 3.778 | 4.035            | 4.043 | 2.072 | 4.045 | 3.905 |
| U7 | H3'              | 4.373            | 4.667            | 4.228 | 4.239            | 4.225 | 4.456 | 4.547 | 4.049 |
| U7 | H4'              | 4.270            | 4.128            | 4.118 | 4.194            | 4.177 | 4.052 | ---   | 3.981 |
| U7 | H5'              | 4.088            | 4.120            | 4.102 | 4.091            | 4.058 | 4.046 | 4.106 | 3.986 |
| U7 | H5''             | --- <sup>a</sup> | --- <sup>a</sup> | 4.368 | --- <sup>a</sup> | 4.240 | 4.174 | 4.252 | 4.213 |
| U7 | H5               | 5.137            | 5.107            | 5.203 | 5.500            | na    | 5.131 | na    | na    |
| U7 | H6               | 7.802            | 7.830            | 7.843 | 7.686            | 7.466 | 7.455 | 7.244 | 7.352 |
| U7 | H2''             | na               | 2.573            | na    | na               | na    | 2.242 | na    | na    |
| U7 | 2'OMe            | na               | na               | 3.585 | na               | na    | na    | na    | na    |
| U7 | Me <sup>b</sup>  | na               | na               | na    | na               | 1.578 | 1.603 | 1.777 | na    |
| U7 | H6 <sup>c</sup>  | na               | na               | na    | na               | na    | na    | 3.735 | na    |
| U7 | H6 <sup>nc</sup> | na               | na               | na    | na               | na    | na    | 3.851 | na    |

<sup>a</sup>most probably degenerate with U7H5'

<sup>b</sup>the thymine base CH<sub>3</sub> group

<sup>c</sup>the LNA sugar bridging CH<sub>2</sub> group

Supplemental Table S2 The <sup>31</sup>P chemical shift (CS) values measured for the G-quadruplexes M0-M7.

| Residue | Atom | M0     | M1     | M2     | M3     | M4     | M5     | M6     | M7     |
|---------|------|--------|--------|--------|--------|--------|--------|--------|--------|
| U1      | P    | -0.945 | -0.966 | -0.940 | -0.799 | -0.947 | -0.814 | -1.006 | -0.896 |
| G2      | P    | -5.008 | ---    | -5.011 | -5.028 | -5.007 | -5.069 | -5.021 | -5.028 |
| G3      | P    | -2.032 | -2.098 | -2.038 | -2.077 | -2.050 | -2.066 | -2.071 | -2.066 |
| U4      | P    | -3.046 | -2.931 | -2.894 | -2.939 | -2.969 | -2.942 | -2.906 | -2.952 |
| G5      | P    | -4.906 | -5.224 | -5.354 | -5.026 | -5.074 | -5.138 | -5.237 | -5.062 |
| G6      | P    | -3.828 | -4.024 | -3.357 | -4.001 | -4.116 | -4.305 | -4.065 | -4.107 |
| U7      | P    | -2.966 | -3.247 | -4.216 | -3.633 | -3.799 | -3.889 | -3.931 | -3.504 |

Supplemental Table S3 The results of the MM-GBSA analysis of the MD trajectories recorded for M0 in two distinct conformations – with reversed and standard U-tetrads at the 3'-terminus.

| Energy Component [kcal/mol] | Reversed U-tetrad (system A) | $\sigma_M$ | Regular U-tetrad (system B) | $\sigma_M$ | Energy difference (A - B) |
|-----------------------------|------------------------------|------------|-----------------------------|------------|---------------------------|
| BOND                        | 240.0                        | 0.2        | 240.3                       | 0.2        | -0.3                      |
| ANGLE                       | 460.8                        | 0.3        | 461.9                       | 0.3        | -1.1                      |
| DIHED                       | 692.0                        | 0.2        | 684.3                       | 0.2        | 7.7                       |
| VDW                         | -572.9                       | 0.2        | -561.7                      | 0.2        | -11.2                     |
| ELE                         | 1031.4                       | 0.6        | 1151.9                      | 0.6        | -120.5                    |
| 1-4 VDW                     | 233.2                        | 0.1        | 233.8                       | 0.1        | -0.6                      |
| 1-4 ELE                     | -2662.2                      | 0.3        | -2664.1                     | 0.3        | 1.9                       |
| EGB                         | -4997.6                      | 0.5        | -5109.3                     | 0.5        | 111.7                     |
| ESURF                       | 29.4                         | 0.0        | 31.3                        | 0.0        | -1.9                      |
| G gas                       | -577.7                       | 0.6        | -453.7                      | 0.6        | -124.0                    |
| G solv                      | -4968.2                      | 0.5        | -5078.0                     | 0.5        | 109.8                     |
| E polar_total               | -6628.4                      |            | -6621.6                     |            | -6.8                      |
| E np_total                  | -310.3                       |            | -296.6                      |            | -13.7                     |
| TOTAL                       | -5545.9                      | 0.4        | -5531.7                     | 0.3        | -14.2                     |

BOND, ANGLE and DIHED denote internal (bond, angle and dihedral angle, respectively) potential energies. VDW represents non-bonded van der Waals energy, ELE - non-bonded electrostatic energy, 1-4 VDW and 1-4 ELE - energy contribution from the non-bonded interactions (VDW and ELE, respectively) between atoms separated by three consecutive bonds, EPB - electrostatic component to solvation free energy modelled with Generalized Born (GB) model, ESURF - nonelectrostatic contribution to solvation energy, G gas - total vacuum energy (G gas = BOND + ANGLE + DIHEDRAL + VDW + ELE + 1-4 VDW + 1-4 ELE), G solv - total solvation free energy, (G solv = EGB + ESURF), E polar\_total = ELE + 1-4 ELE + EGB, E np\_total = VDW + 1-4 VDW + ESURF, TOTAL = G gas + G sol = BOND + ANGLE + DIHEDRAL + E polar\_total + E np\_total,  $\sigma_M$  - standard error of the mean.
